# Supplementary material
Source: publisher figshare collection journal article supplement (https://rs.figshare.com/ndownloader/files/22898702)
Supplement: Supplementary file 1 [file 22898702]

## Sheet: PCA.Loadings.PeaksRemoved (1)
	PC1	PC2	PC3	PC4	PC5	PC6	PC7	PC8	PC9	PC10	PC11	PC12	PC13	PC14	PC15	PC16	PC17	PC18	PC19	PC20	PC21	PC22	PC23	PC24	PC25	PC26	PC27	PC28	PC29
Peak1	0.19641	-0.109949	0.0705839	-0.210902	0.411534	-0.178718	0.223623	-0.28898	0.00763057	0.153576	-0.272928	-0.0107604	0.263512	-0.22902	-0.0792889	-0.0227826	-0.12564	-0.0175249	0.00877225	0.182374	0.515165	-0.00829139	-0.0726158	-0.0947097	-0.0211631	0.0198602	0.0817957	0.0377588	0.00403849
Peak2.3	0.238746	-0.222637	-0.0160278	0.18626	0.0363166	-0.0188143	0.310385	-0.210628	-0.10695	0.274339	-0.00827299	0.208928	-0.0102279	0.0673807	0.246921	-0.192806	0.048782	-0.215676	0.131792	0.0459511	-0.28674	-0.249502	0.441786	0.220313	0.1009	0.0900299	0.0265023	0.0603725	-0.0608738
Peak4	0.150538	-0.209523	0.129369	-0.0651904	0.175509	-0.142669	-0.122954	0.0526562	-0.0768816	0.0280913	-0.00261328	-0.0132581	-0.12408	0.0155018	0.042956	0.0604009	-0.0545624	-0.0864275	-0.201099	0.153487	-0.291399	0.337196	0.30061	-0.582861	-0.173407	-0.271619	-0.0887606	-0.000869696	-0.0226312
Peak5	-0.453424	-0.31613	-0.153235	-0.019355	0.281498	0.0596915	0.221834	0.182109	2.83011e-05	-0.133259	0.239046	0.299173	0.192911	-0.157059	0.310564	0.272261	-0.0159285	-0.124916	-0.249902	-0.105486	0.0271707	-0.0435179	-0.0643005	0.0400871	-0.0330143	-0.0319732	-0.0882743	0.0244604	0.0161075
Peak6	0.142502	-0.22186	-0.0111925	0.173959	0.0698124	0.161214	0.160004	0.0265132	0.0521299	0.0328897	-0.0126062	-0.109038	-0.00391018	0.0920218	0.0181407	-0.0418572	-0.169178	0.123444	0.0246866	-0.0925861	-0.211261	-0.0954015	-0.322507	-0.11418	-0.620001	0.296656	0.31454	-0.110058	0.0960667
Peak7	0.150022	-0.202973	-0.02143	0.112194	0.219237	0.0839391	0.124754	0.538866	0.327914	0.115599	-0.115099	-0.526426	0.0206623	-0.13263	-0.0423189	0.0803586	0.164983	-0.0690445	0.163949	-0.0832371	-0.0219565	-0.0307932	0.0730988	0.0670932	0.186384	-0.0559347	-0.0981208	0.010094	-0.00122947
Peak8	0.157383	-0.186429	0.113723	-0.208235	-0.0564475	-0.10058	0.199461	-0.0924804	-0.0656992	-0.154623	-0.112321	-0.0740597	0.0122327	0.0523676	-0.113471	0.137628	-0.253342	-0.030914	-0.0849043	0.0362595	-0.350403	0.380788	-0.265456	0.469267	0.102483	-0.0903985	-0.107998	0.240667	0.145345
Peak9	0.060409	-0.111441	-0.093884	-0.237769	-0.0305572	-0.0995154	0.424629	0.0418083	0.297543	-0.390388	0.0347889	0.171253	-0.325095	0.284917	0.0317586	-0.0754952	0.243125	0.295708	0.163832	0.233041	0.105835	-0.028112	0.0229059	-0.0832954	0.0071989	-0.0829229	0.00830207	-0.0794819	-0.0131539
Peak10	0.203531	-0.193724	-0.061366	0.17856	-0.01702	0.151594	0.00969048	-0.149512	-0.0427994	0.0701211	0.202201	0.0153686	-0.0515654	0.176507	-0.0301771	-0.0360783	-0.19546	0.0302873	0.0963469	-0.0694321	0.126523	-0.143279	-0.30271	-0.242955	0.134029	0.0393965	-0.703485	0.0306817	0.00329076
Peak11	0.119913	-0.130662	0.0217116	-0.203757	0.120924	-0.0389361	-0.145583	0.0525483	-0.0253096	0.0239276	0.0599648	0.0606718	-0.0533423	0.00627823	0.0273715	-0.000680272	0.10389	0.0071415	-0.140171	0.0364832	-0.119021	0.186279	-0.153041	-0.0190327	0.315915	0.588582	0.059921	-0.276293	-0.493669
Peak12	0.0678694	-0.133021	0.102393	-0.333131	-0.135516	0.619572	0.0829083	-0.108912	-0.103768	0.199216	0.123972	0.115135	0.0142818	-0.31638	-0.22368	0.224384	0.174885	0.270817	0.138219	-0.038926	-0.0695874	0.0314101	0.126283	-0.0487401	0.00620321	-0.0730794	0.0320054	-0.00972006	0.0176198
Peak13	0.106703	-0.184482	0.0339879	-0.148187	-0.185047	0.124509	-0.230607	0.0923343	0.127881	-0.224632	0.118522	0.0273331	-0.183825	-0.0539231	-0.0469239	0.234634	-0.395252	-0.47401	0.167258	0.31667	0.143651	-0.261912	0.0734407	-0.00233381	0.0207982	0.072712	0.183132	0.0365035	0.00819156
Peak14	0.148572	-0.150728	0.122207	-0.231934	0.384723	-0.233278	-0.445879	0.0823064	0.009705	0.06354	0.181013	0.199293	-0.074399	0.110586	-0.218121	-0.0231477	0.20136	0.120341	-0.00815358	-0.117335	-0.0724986	-0.32421	-0.00619672	0.262355	-0.132725	-0.0539324	-0.0653029	-0.0123385	0.250871
Peak15	-0.163127	-0.210756	-0.0268739	-0.175294	0.104589	0.286123	-0.024948	-0.12113	-0.194279	-0.10744	0.285219	-0.417636	0.122501	0.378717	-0.075099	-0.398848	0.0380297	-0.136815	-0.147169	0.0287227	0.195643	0.0967671	0.153719	0.135731	-0.0630287	-0.0952798	0.0820155	-0.00246508	-0.0953275
Peak16	0.151645	-0.165317	-0.11191	0.371492	0.149079	0.205559	-0.204329	-0.199026	-0.17095	-0.599361	-0.347612	0.034534	0.141354	-0.054234	-0.110878	0.134894	0.282213	0.00235245	-2.12734e-05	0.00999773	-0.0252524	-0.0227009	0.0769846	0.0147761	0.0388448	0.0243138	-0.00976158	-0.000287592	-0.0127697
Peak17	0.108572	-0.146719	-0.000484538	-0.077151	-0.0476052	0.0735996	-0.240663	0.156373	0.0123343	-0.197633	-0.0320124	0.0636417	0.0526419	-0.387888	0.417001	-0.534436	-0.280175	0.323338	0.0970386	-0.00630536	0.00111908	0.0510208	0.00961355	0.0634407	0.0645686	-0.0909119	-0.0107474	-0.00947468	0.0423165
Peak18	0.037354	0.16402	-0.528354	-0.185916	0.17341	0.247415	-0.229318	-0.129859	0.342617	0.180681	-0.215728	0.0508189	0.21369	0.300203	0.170216	0.126289	-0.159455	0.0652714	0.0113285	0.143285	-0.187897	0.0210416	0.00854369	0.0481454	0.0178824	-0.14305	-0.0119795	-0.082715	-0.0336241
Peak19	0.13847	-0.175897	0.0247599	-0.125538	-0.186452	-0.238941	-0.0885752	-0.112066	-0.0146692	-0.0584662	0.0326657	-0.0742591	0.149637	0.120714	0.212433	0.271958	-0.0104285	0.0433264	0.306954	-0.505818	0.12319	0.0042852	0.0281331	0.0180712	-0.146989	-0.244927	0.0861819	0.0259418	-0.443755
Peak20	0.101649	0.0629734	-0.413489	-0.202042	-0.0372447	-0.0216389	0.0625485	-0.043955	0.226718	-0.118243	0.0130147	0.129151	-0.0840751	-0.226165	-0.286312	-0.287612	0.0518596	-0.322543	-0.0615377	-0.434424	-0.0267085	0.119989	0.0915906	-0.12089	-0.122944	0.170355	-0.0618463	0.274751	0.0162691
Peak21	0.215947	-0.157582	-0.254611	0.321698	0.0261851	-0.016846	-0.0112452	0.00676757	-0.0158422	0.147954	0.273179	0.158957	-0.111691	-0.00253382	-0.161677	-0.0421941	-0.0128756	0.0396721	-0.121419	-0.0424473	0.085693	0.109124	-0.261961	-0.0549736	0.353547	-0.356846	0.484347	0.0222884	0.00595387
Peak22	0.0895623	-0.138765	-0.0037941	-0.145961	-0.180575	-0.00740371	-0.120143	-0.0401025	-0.0356352	0.0641324	-0.0424572	-0.103819	0.0634692	0.211782	0.383533	0.127713	0.228409	0.021336	-0.0498927	-0.119515	0.13722	0.0756256	-0.00564002	-0.217288	0.223161	0.301979	0.160859	0.302712	0.522256
Peak24	0.079397	-0.131774	-0.0088167	-0.117436	-0.317535	0.0147719	-0.0723325	0.0695807	0.00914324	0.143016	-0.179147	0.0320795	0.0866305	-0.0974057	0.131301	-0.156388	0.448778	-0.242592	-0.228638	0.282173	-0.0325355	-0.184504	-0.393776	0.0157661	-0.195432	-0.223192	-0.0833915	0.139161	-0.205199
Peak25	-0.428373	-0.445126	0.171728	0.17809	-0.154871	-0.0691723	-0.185748	-0.352388	0.503865	0.156806	-0.161497	-0.00306902	-0.107854	-0.0414857	-0.14532	-0.0787357	-0.000220367	0.0775051	-0.0217777	-0.0260924	0.00253745	0.0919216	0.0572628	0.0308503	0.0483346	0.0341892	-0.00452509	-0.0323648	0.00726828
Peak27.28	0.0935283	-0.0996656	-0.157301	-0.0909711	-0.22597	-0.144932	0.0627053	-0.0824493	-0.0550475	-0.0140802	0.024411	-0.0606338	0.124555	-0.115048	0.00488101	-0.00278138	0.0843049	-0.227115	0.0164769	-0.079515	0.00741976	0.0912071	-0.00342813	0.0439523	0.00515873	-0.0833554	-0.0828093	-0.781696	0.358803
Peak29	0.139995	-0.0963847	-0.308352	0.212016	-0.16487	-0.159725	-0.115806	0.091638	-0.00641297	0.122904	0.27382	0.0107063	0.0751132	-0.096056	-0.0306742	0.151137	0.0885545	0.186885	0.0287296	0.326293	0.252755	0.345548	0.222275	0.256285	-0.322846	0.197596	-0.147552	0.117078	-0.0223108
Peak30	0.0953097	-0.161644	-0.112347	-0.0485841	-0.227402	0.0288439	0.0611843	0.233156	-0.142109	0.0771221	-0.366964	0.0414077	-0.165783	0.136029	-0.122123	0.0744985	-0.239848	0.222754	-0.552478	-0.176235	0.215014	-0.215857	0.236409	0.0857265	0.00224861	0.00429182	-0.0416673	-0.0772146	-0.0544256
Peak32	-0.298316	-0.233967	-0.169656	-0.0568772	-0.0240016	-0.0478479	-0.0422331	0.32746	-0.373801	0.152332	-0.325461	0.239701	0.0552983	0.195261	-0.222649	-0.138825	-0.032845	-0.0640466	0.479544	0.0466356	0.0138963	0.146493	-0.0730051	-0.0916033	0.0230139	0.0303144	0.0203404	0.0269117	0.027327
Peak33	-0.126566	-0.108073	-0.252341	-0.106008	-0.167739	-0.322688	0.0580234	-0.072726	-0.0882721	-0.100038	0.159961	-0.268587	0.360507	-0.128255	-0.235567	0.0125162	-0.0770315	0.258186	-0.0213873	0.16833	-0.31413	-0.383118	0.0499743	-0.214622	0.156017	0.0659638	0.0505411	0.108075	-0.0234136
Peak34	-0.178516	-0.037675	-0.34365	-0.0844661	0.168105	-0.0708801	-0.0524328	-0.244323	-0.295667	0.0823753	-0.084026	-0.329338	-0.629561	-0.239618	0.191139	0.111076	0.0455978	0.0316853	0.0781356	0.0169449	-0.0184306	-0.0793995	-0.0961339	0.071363	-0.0389057	-0.0282718	-0.0149476	0.0159192	-0.012199
